1 **Evidence for sex microchromosomes in a species with temperature-**  
2 **influenced sex determination (*Crotaphytus collaris*)**

3 Authors: Jodie M. Wiggins<sup>1</sup>, Enrique Santoyo-Brito<sup>1</sup>, Jon B. Scales<sup>2</sup>, Stanley F. Fox<sup>1</sup>

4 1. Department of Integrative Biology, Oklahoma State University, OK 74078, USA

5 2. Department of Biology, Midwestern State University, TX 76308, USA

6 **Keywords**

7  
8 Sex-determining mechanism, genotypic sex determination, temperature-dependent sex  
9 determination, gene-dosage, sex microchromosome, reptile, *Crotaphytus collaris*

10

11 **Abstract**

12

13 The characteristics of a species' evolution can be powerfully influenced by its mode of sex

14 determination and, indeed, sex determination mechanisms vary widely among eukaryotes. In

15 non-avian reptiles, sex was long thought to be determined bimodally, either by temperature or

16 genetics. Here we add to the growing evidence that sex determining mechanisms in reptiles fall

17 along a continuum rather than existing as a mutually exclusive dichotomy. Using qPCR, we

18 demonstrate that the lizard *Crotaphytus collaris* possesses sex-based gene dosage consistent with

19 the presence of sex microchromosomes, despite that extreme incubation temperatures can

20 influence hatchling sex ratio. Our results suggest a temperature override that switches genotypic

21 females to phenotypic males at high and low temperatures.

22

23

24

25

## 26 **Introduction**

27 Mode of sex determination has far reaching consequences affecting evolutionary processes such  
28 as speciation (Haldane 1922), adaptive capability and heterozygosity (Bull 1983; Shine et al.  
29 2002; Burt and Trivers 2006), maternal capacity for sex ratio manipulation (Kratochvíl et al.  
30 2008), extent of secondary sexual characteristics (Reeve and Pfennig 2003) and capacity to  
31 respond to climate change (Mitchell and Janzen 2010). Among eukaryotes, the array of sex  
32 determination mechanisms (SDMs) is diverse (Bull 1983; Charlsworth 1996; Bachtrog et al.  
33 2014). Environmental sex determination (ESD) is characterized by a mode of sex determination  
34 entirely dependent on environmental factors such as temperature encountered during  
35 embryogenesis (Merchant-Larios and Díaz-Hernández 2013), photoperiod (Walker 2005; Guler  
36 et al. 2012), or social cues during subsequent development (Bull 1983; Janzen and Paukstis  
37 1991; Valenzuela and Lance 2004; Bachtrog et al. 2014). Conversely, sex in GSD species is  
38 determined at conception by genes, and is uninfluenced by environment (Bull 1983; Sarre et al.  
39 2004).

40 Long held was the belief that within reptilian lineages there existed a single dichotomy of  
41 mutually exclusive SDMs (Bull 1983; Janzen and Paukstis 1991). Either a species' sex was  
42 thought to be determined by the environment (environmental sex determination; ESD) or by sex  
43 chromosomes (genotypic sex determination; GSD) (Bull 1983; Janzen and Paukstis 1991;  
44 Bachtrog et al. 2014). In fact, reptilian species do utilize both male and female heterogamety  
45 (GSD) (King 1977) and temperature-dependent sex determination (TSD; a specific type of ESD)  
46 (Ewert and Nelson 1991). However, in recent years, the line between ESD and GSD has become  
47 decidedly blurred, and an increasingly complex picture is emerging in which GSD and TSD are  
48 the ends of a continuum of SDMs in reptiles. Examples of intermediate SDMs include species in

49 which different populations utilize different sex determining mechanisms (Pen et al. 2010),  
50 temperature-dependent sex reversal of a species with a ZZ/ZW GSD system in the wild (Quinn  
51 et al. 2007; Holleley et al. 2015), and revelations of the genetic underpinnings of TSD in  
52 alligators and turtles (Spotila et al. 1998; Smith et al. 1999; Kettlewell et al. 2000; Western and  
53 Sinclair 2001). This shifting landscape provides an exceptional study system for better  
54 understanding sex determination in vertebrates (Sarre et al. 2004).

55 The collared lizard, *Crotaphytus collaris*, is a widespread, oviparous species in which sex  
56 chromosomes have not been identified (Gorman 1973; De Smet 1981). Yet, *C. collaris* has been  
57 classified as a GSD species based on phylogenetic analyses (Pokorna and Kratochvíl 2009).  
58 However, as mentioned above, even members of the same species can utilize different sex  
59 determining mechanisms (Pen et al. 2010). Thus, classifying *C. collaris* solely based on  
60 phylogeny may provide an incorrect or incomplete picture (Viets et al. 1994). Compellingly, in  
61 an investigation seeking to determine if *C. collaris* utilizes TSD, an inverse TSD type II pattern  
62 was identified in which the percentage of female offspring declined as constant incubation  
63 temperatures or treatments approached high and low extremes (Santoyo-Brito et al. 2017). While  
64 the authors of this study point out that their sample size was low, this indicates a  
65 temperature influence on sex determination in *C. collaris*. However, even at low and high  
66 treatments this study did not find ratios of either sex nearing 100%. These findings hint at a more  
67 complex mechanism for sex determination than pure TSD or pure GSD in *C. collaris*, as  
68 suggested in other reptile species (Quinn et al. 2007; Radder et al. 2008; Holleley et al. 2015). In  
69 species that possess XY sex chromosomes, the heterogametic sex is expected to have half the  
70 dosage of X-linked genes (Rovatsos et al. 2014a). Indeed, sex-specific gene dosage at two loci in  
71 the closely related *Crotaphytus insularis* points to heterogamety (males are heterogametic) and,

72 thus, to the possibility of GSD in Crotaphytids (Rovatsos et al. 2014b). The apparent conflict  
73 between the findings of the above studies compels us to determine if *C. collaris* demonstrates  
74 gene dosage akin to that identified in *C. insularis*.

75

## 76 **Methods**

### 77 DNA isolation and PCR

78 Blood was collected from the toes of twenty wild caught lizards (10 male, 10 female)  
79 upon capture at Sooner Lake Dam, Pawnee Co., Oklahoma. Blood was immediately preserved  
80 on Whatman FTA classic cards. DNA was later extracted from the cards by excising a 3-mm  
81 square of blood-saturated card using sterile scissors then following the GE Healthcare extraction  
82 protocol using Chelex® 100 resin. We tested for gene dosage in the genes ATP2A2  
83 (sarcoplasmic reticulum calcium ATPase 2), TMEM (transmembrane protein 123D), and PEBP1  
84 (phosphatidylethanolamine binding protein 1) (Table 1). Primer sequences for the genes TMEM,  
85 PEBP1, and ATP2A2 were obtained from Rosavatos et al (2014; Table 1). The single copy gene  
86 EF1 $\alpha$  was used for gene dosage normalization. PCRs were assembled in 25- $\mu$ l final volumes  
87 containing 12.5  $\mu$ l 2X Bullseye EvaGreen qPCR master mix buffer (MidSci, St. Louis, MO), 25  
88 ng genomic DNA, and 200 pMoles forward and reverse primers. The thermal profile was an  
89 initial denaturation of 10 min at 94°C followed by 40 cycles of 94°C for 30 sec, 55°C for 30 sec,  
90 72°C for 45 sec. Amplification via qPCR was executed in a Stratagene MX3005 thermocycler.

91

### 92 Gene Dosage Calculations

93 Final gene dosage ratios were calculated for the two male and two female lizards whose  
94 DNA consistently and reliably amplified across three replicates. Crossing point values were

95 calculated in MaxPro (Stratagene) then normalized to EF1 $\alpha$ . Gene dosage was calculated as in  
96 Rosavotas et al. (2014b) with:  $R = [2^{Cp \text{ gene}} / 2^{Cp \text{ EF1}\alpha}]^{-1}$  and r (relative gene dosage ratio) =  
97  $R_{\text{male}} / R_{\text{female}}$ . It was expected that male *C. collaris* are the heterogametic sex based on results in  
98 the closely related *Crotaphytus insularis* (Rovatsos et al. 2014b), thus an r = 0.5 is expected for  
99 single copy, X-linked genes while r = 1.0 is expected for autosomal genes.

100

## 101 **Results**

102 Results demonstrate sex-linked differences for all three analyzed genes (ATP2A2,  
103 TMEM, and PEBP1; Fig 1). In each case, the average female r value is exactly one. This result is  
104 consistent with females having two copies of the gene of interest and, thus, being the  
105 homogametic sex. For each gene an average value near 0.5 was obtained in the males (ATP2A2  
106 = 0.59, TMEM = 0.61, PEBP1 = 0.59). This result is consistent with males having a single gene  
107 copy and being heterogametic.

108

## 109 **Discussion**

110 Though sex chromosomes have not been detected in Crotaphytids (Gorman 1973; De  
111 Smet 1981) our results are consistent with heterogamety and point to the existence of GSD in *C.*  
112 *collaris* as in *C. insularis* (Rovatsos et al. 2014b). While GSD is common among lizards, *C.*  
113 *collaris* has been shown to experience changes in sex ratios with varying incubation  
114 temperatures (Santoyo-Brito et al. 2017). *Crotaphytus collaris* may be another in the emerging  
115 examples of a reptilian species with GSD that can be overridden by temperature extremes (Shine  
116 et al. 2002; Holleley et al. 2015). We agree with Santoyo-Brito et al. (2017) that *C. collaris*  
117 likely possess sex microchromosomes in an XX/XY pattern and that extreme incubation

118 temperatures alter the sex determining pathway such that XX individuals develop as phenotypic  
119 males. We further hypothesize that gravid *C. collaris* females select nest sites such that GSD will  
120 function without temperature interference as evidenced by field hatchling ratios near 50/50 as  
121 expected in GSD populations (Wiggins unpublished data).

122 Evidence continues to emerge that some extant reptile species employ multimodal sex  
123 determining mechanisms (Shine et al. 2002; Valenzuela et al. 2003; Sarre et al. 2004; Quinn et  
124 al. 2007; Radder et al. 2008; Holleley et al. 2015). These species may be at a transition point  
125 from GSD to TSD. *Crotaphytus collaris* demonstrates gene dosage consistent with that of 28  
126 species of Pleurodont iguanian lizards (Pleurodonta) spanning 11 genera and including *Anolis*  
127 *carolinensis* and *C. insularis* (Rovatsos et al. 2014a,b). The absence of genes on the Y that are  
128 present on the X, coupled with the chromosomal looping in the *A. carolinensis* XY synaptonemal  
129 complex, points to a degenerate Y microchromosome in this species and, subsequently, those  
130 with the same sex-based gene dosage (Alföldi et al. 2011; Bachtrog et al. 2014; Rovatsos et al.  
131 2014a,b; Lisachov et al. 2017). Thus, there exists the strong possibility that *C. collaris* also  
132 possesses a degenerate Y microchromosome. Results from Santoyo-Brito et al. (2017) show a  
133 decline in number of females hatched at extreme high and low temperatures, pointing to a  
134 temperature override that converts XX individuals into phenotypic males (XXm). If these XXm  
135 are viable, they may mate and reproduce (as males). While this scenario will lead to an increase  
136 in the proportion of genetic females, the possibility of producing offspring who possess both  
137 degenerate chromosomes (YY) would be avoided as in *Bassiana duperreyi* (Shine et al. 2002).  
138 As a result, GSD and TSD could conceivably co-exist in *C. collaris* without a definitive  
139 transition to one or the other. However, as global temperatures rise, frequent shifts of XXf to  
140 XXm could eliminate the Y microchromosome, driving this species to pure TSD and increasing

141 its vulnerability to extinction by fixation of homogamety and absence of XY individuals  
142 (Mitchell and Janzen 2010).

143 In summary, our data convincingly point to the presence of as-yet unidentified sex  
144 microchromosomes in *C. collaris* as suggested by Santoyo-Brito et al. (2017) and add to the  
145 growing evidence that SDMs in non-avian reptiles are not bimodal (Shine et al. 2002; Holleley et  
146 al. 2015). Further inquiry into the effects of extreme temperature incubations on *C. collaris* sex  
147 determination is warranted (Santoyo-Brito et al. 2017); specifically, investigating whether some  
148 of the individuals incubated at either high or low temperature extremes are genotypically female  
149 but phenotypically male as suggested by Santoyo-Brito et al. (2017) and as shown in free-  
150 ranging *P. vitticeps* (Holleley et al. 2015), if such individuals are reproductively viable, and if  
151 they exist in natural populations.

152

153

154

155

156

157

158

159

160

161

162

163

164 **Literature Cited**

- 165 Alföldi, J., F. Di Palma, M. Grabherr, C. Williams, L. Kong, E. Mauceli, P. Russell, C. B. Lowe,  
166 R. E. Glor, J. D. Jaffe, D. A. Ray, S. Boissinot, A. M. Shedlock, C. Botka, T. A. Castoe, J.  
167 K. Colbourne, M. K. Fujita, R. G. Moreno, B. F. ten Hallers, D. Haussler, A. Heger, D.  
168 Heiman, D. E. Janes, J. Johnson, P. J. de Jong, M. Y. Koriabine, M. Lara, P. A. Novick, C.  
169 L. Organ, S. E. Peach, S. Poe, D. D. Pollock, K. de Queiroz, T. Sanger, S. Searle, J. D.  
170 Smith, Z. Smith, R. Swofford, J. Turner-Maier, J. Wade, S. Young, A. Zadissa, S. V  
171 Edwards, T. C. Glenn, C. J. Schneider, J. B. Losos, E. S. Lander, M. Breen, C. P. Ponting,  
172 and K. Lindblad-Toh. 2011. The genome of the green anole lizard and a comparative  
173 analysis with birds and mammals. *Nature* 477:587–91.
- 174 Bachtrog, D., J. E. Mank, C. L. Peichel, M. Kirkpatrick, S. P. Otto, T.-L. Ashman, M. W. Hahn,  
175 J. Kitano, I. Mayrose, R. Ming, N. Perrin, L. Ross, M. N. Valenzuela, and J. C. Vamosi.  
176 2014. Sex Determination: Why So Many Ways of Doing It? *PLoS Biol.* 12:1–13.
- 177 Bull, J. J. 1983. *Evolution of sex determining mechanisms*. Benjamin/Cummings Publishing  
178 Company, Menlo Park, California.
- 179 Burt, A., and R. Trivers. 2006. *Genes in Conflict*. Harvard University Press, Cambridge,  
180 Massachusetts.
- 181 Charlsworth, B. 1996. The evolution of chromosomal sex determination and dosage  
182 compensation. *Curr. Biol.* 6:149–162.
- 183 De Smet, W. 1981. Description of the orcein stained karyotypes of 27 lizard species (Lacertilia,  
184 Reptilia) belonging to the families Iguanidae, Agamidae, Chamaeleontidae and Gekkonidae  
185 (Ascala- bota). *Acta Zool. Pathol. Antverp.* 76:35–72.
- 186 Ewert, M. A., and C. E. Nelson. 1991. Sex determination in turtles: patterns and some possible



- 187           adaptive values. *Copeia* 1:50–69.
- 188   Gorman, G. 1973. The chromosomes of the Reptilia, a cytotaxonomic interpretation. Pp. 349–  
189           424 *in* A. Chiarelle and E. Cpanna, eds. *Cytotaxonomic and Vertebrate Evolution*.  
190           Academic Press, Inc., USA.
- 191   Guler, Y., S. Short, P. Kile, and A. Fort. 2012. Integrating field and laboratory evidence for  
192           environmental sex determination in the amphipod, *Echinogammarus marinus*. *Mar. Biol.*  
193           159:2885–2890.
- 194   Haldane, J. B. S. 1922. Sex ratio and unisexual sterility in hybrid animals. *J. Genet.* 12:101–109.
- 195   Holleley, C. E., D. O’Meally, S. D. Sarre, J. A. Marshall-Graves, T. Ezaz, K. Matsubara, B.  
196           Azad, X. Zhang, and A. Georges. 2015. Sex reversal triggers the rapid transition from  
197           genetic to temperature-dependent sex. *Nature* 523:79–82.
- 198   Janzen, F. J., and G. Paukstis. 1991. Environmental sex determination in reptiles: ecology,  
199           evolution, and experimental design. *Q. Rev. Biol.* 66:149–179.
- 200   Kettlewell, J. R., C. S. Raymond, and D. Zarkower. 2000. Temperature-dependent expression of  
201           turtle *Dmrt1* prior to sexual differentiation. *Genesis* 26:174–178.
- 202   King, M. 1977. Evolution and Reproduction. Pp. 55–60 *in* J. Calaby and H. Tyndale-Biscoe, eds.  
203           Evolution and Reproduction. Australian Academy of Science, Canberra.
- 204   Kratochvíl, L., L. Kubicka, and E. Landova. 2008. Does the mechanism of sex determination  
205           constrain the potential for sex manipulation? A test in geckos with contrasting sex-  
206           determining systems. *Naturwissenschaften* 95:209–215.
- 207   Lisachov, A. P., V. A. Trifonov, M. Giovannotti, M. A. Ferguson-Smith, and P. M. Borodin.  
208           2017. Heteromorphism of “Homomorphic” Sex Chromosomes in Two Anole Species  
209           (Squamata, Dactyloidae) Revealed by Synaptonemal Complex Analysis. *Cytogenet.*

- 210 Genome Res. 151:89–95.
- 211 Merchant-Larios, H., and V. Díaz-Hernández. 2013. Environmental sex determination  
212 mechanisms in reptiles. *Sex Dev.* 7:95–103.
- 213 Mitchell, N. J., and F. J. Janzen. 2010. Temperature-Dependent Sex Determination and  
214 Contemporary Climate Change. *Sex. Dev.* 4:129–140.
- 215 Pen, I., T. Uller, B. Feldmeyer, A. Harts, G. M. While, and E. Wapstra. 2010. Climate-driven  
216 population divergence in sex-determining systems. *Nature* 468:436–438. Nature Research.
- 217 Pokorna, M., and L. Kratochvíl. 2009. Phylogeny of sex-determining mechanisms in squamate  
218 reptiles: are sex chromosomes an evolutionary trap? *Zool. J. Linn. Soc.* 156:168–183.
- 219 Quinn, A. E., A. Georges, S. D. Sarre, F. Guarino, T. Ezaz, and J. A. M. Graves. 2007.  
220 Temperature Sex Reversal Implies Sex Gene Dosage in a Reptile. *Science.* 316:411.
- 221 Radder, R. S., A. E. Quinn, A. Georges, S. D. Sarre, and R. Shine. 2008. Genetic evidence for  
222 co-occurrence of chromosomal and thermal sex-determining systems in a lizard. *Biol. Lett.*  
223 4:176–8.
- 224 Reeve, H. K., and D. W. Pfennig. 2003. Genetic biases for showy males: Are some genetic  
225 systems especially conducive to sexual selection? *PNAS* 100:1089–1094.
- 226 Rovatsos, M., M. Altmanová, M. Pokorná, and L. Kratochvíl. 2014a. Conserved sex  
227 chromosomes across adaptively radiated anolis lizards. *Evolution (N. Y).* 68:2079–2085.
- 228 Rovatsos, M., M. Pokorná, M. Altmanová, L. Kratochvíl, and M. Pokorna. 2014b. Cretaceous  
229 park of sex determination : sex chromosomes are conserved across iguanas. *Biol. Lett.*  
230 10:1–4.
- 231 Santoyo-Brito, E., M. Anderson, and S. F. Fox. 2017. Incubation Temperature Modifies Sex  
232 Ratio of Hatchlings in Collared Lizards, *Crotaphytus collaris*. *J. Herpetol.* 51:197–201.

- 233 Sarre, S. D., A. Georges, and A. E. Quinn. 2004. The ends of a continuum: Genetic and  
234 temperature-dependent sex determination in reptiles. *BioEssays* 26:639–645.
- 235 Shine, R., M. J. Elphick, and S. Donnellan. 2002. Co-occurrence of multiple, supposedly  
236 incompatible modes of sex determination in a lizard population. *Ecol. Lett.* 5:486–489.
- 237 Smith, C., P. McClive, P. Western, K. Reed, and A. Sinclair. 1999. Evolution- Conservation of a  
238 sex-determining gene. *Nature* 402:601–602.
- 239 Spotila, L. D., J. R. Spotila, and S. E. Hall. 1998. Sequence and Expression Analysis of Wt1 and  
240 Sox9 in the Red-Eared Slider Turtle, *Trachemys Scripta*. *J. Exp. Zool.* 281:417–427.
- 241 Valenzuela, M. N., D. C. Adams, and F. J. Janzen. 2003. Pattern Does Not Equal Process:  
242 Exactly When Is Sex Environmentally Determined? *Am. Nat.* 161:676–683.
- 243 Valenzuela, M. N., and V. Lance. 2004. Temperature Dependent Sex Determination in  
244 Vertebrates. Smithsonian Books, Washington, DC.
- 245 Viets, B. E., M. A. Ewert, L. G. Talent, and C. E. Nelson. 1994. Sex-Determining Mechanisms  
246 in Squamate Reptiles. *J. Exp. Zool.* 56:45–56.
- 247 Walker, G. 2005. Sex determination in the larvae of the parasitic barnacle *Heterosaccus lunatus*:  
248 an experimental approach. *J. Exp. Mar. Bio. Ecol.* 318:31–38.
- 249 Western, P., and A. Sinclair. 2001. Sex, genes, and heat: Triggers of diversity. *J. Exp. Zool.*  
250 290:624–631.

251

252

253

254

255

256 **Table 1. Genes and primer sequences used to determine relative gene dosage through**  
257 **qPCR in *Crotaphytus collaris***

| <b>Gene short name</b> | <b>Gene name</b>                                    | <b>Forward Primer</b>      | <b>Reverse Primer</b>       | <b>Amplicon size</b> |
|------------------------|-----------------------------------------------------|----------------------------|-----------------------------|----------------------|
| <b>EF1a</b>            | Elongation factor 1                                 | CCTTATTGTTGCT<br>GCTGGTGTT | GTGCTAACTTCTT<br>TGACGATTTC | 189                  |
| <b>TME</b>             | Transmembrane protein 132D                          | TATCCGAGCAGA<br>CCCAAAGTCC | AAGGAGACCCAA<br>CTCAGCCAC   | 183                  |
| <b>ATP</b>             | Sarcoplasmic/endoplasmic reticulum calcium ATPase 2 | CAAAGCAGCGG<br>GCATTTAGG   | ATCACTGGGGAC<br>AACAAGGG    | 160                  |
| <b>PEPB</b>            | Phosphatidylethanolamine-binding protein 1          | GACAGGGCTCCA<br>TCGCTAC    | CATAGTCATCCCA<br>CTCCGCC    | 188                  |

258

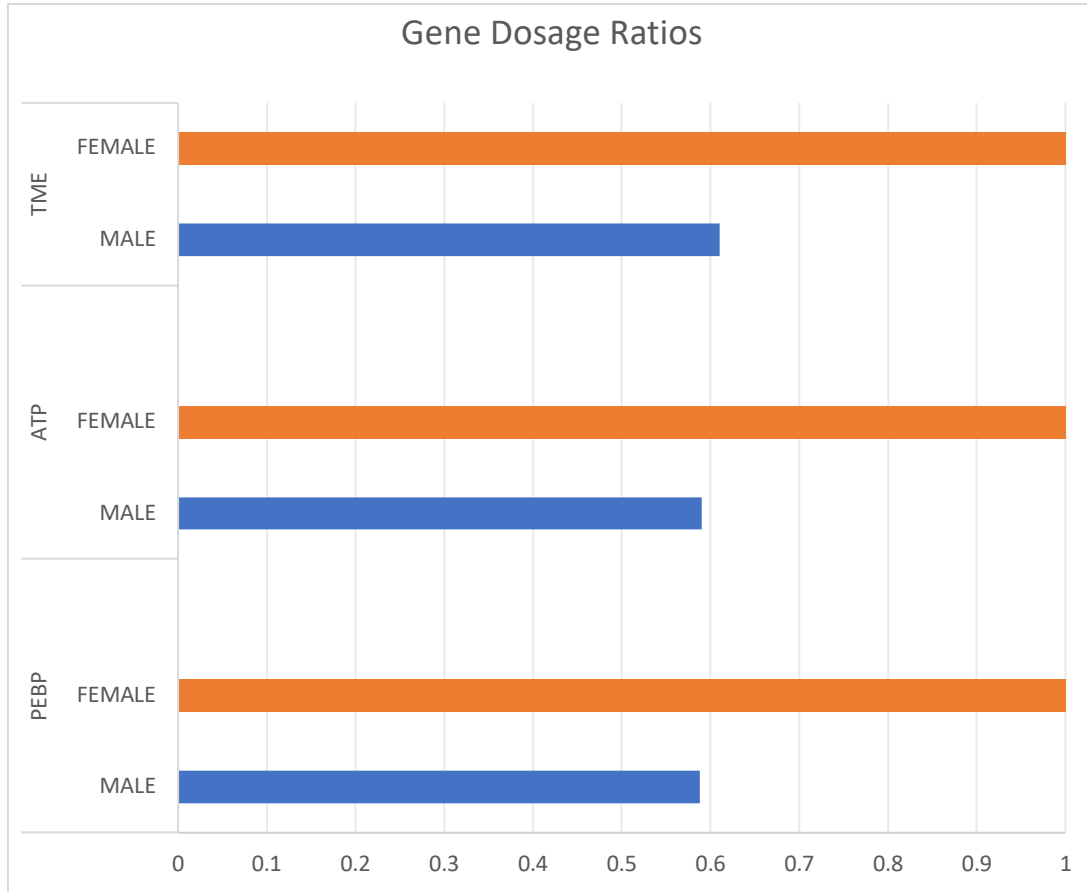

259

**Figure 1.** Relative gene dosage at genes PEBP, ATP, and TME for the two males and two females whose DNA amplified consistently and reliably across three replicates. For each gene, the female gene dosage is exactly 1 and the male gene dosage is near 0.5. Each of these genes maps to the *Anolis carolinensis* X microchromosome, thus, this pattern is consistent with male heterogamety.
